# Supplementary material for: The acetyllysine reader BRD3R promotes human nuclear reprogramming and regulates mitosis
Source: PubMed Central journal article supplement (PMC4786677; doi:10.1038/ncomms10869), 2016-03-07
Supplement: ncomms10869-s1.pdf [file ncomms10869-s1.pdf]

## Supplementary Figures

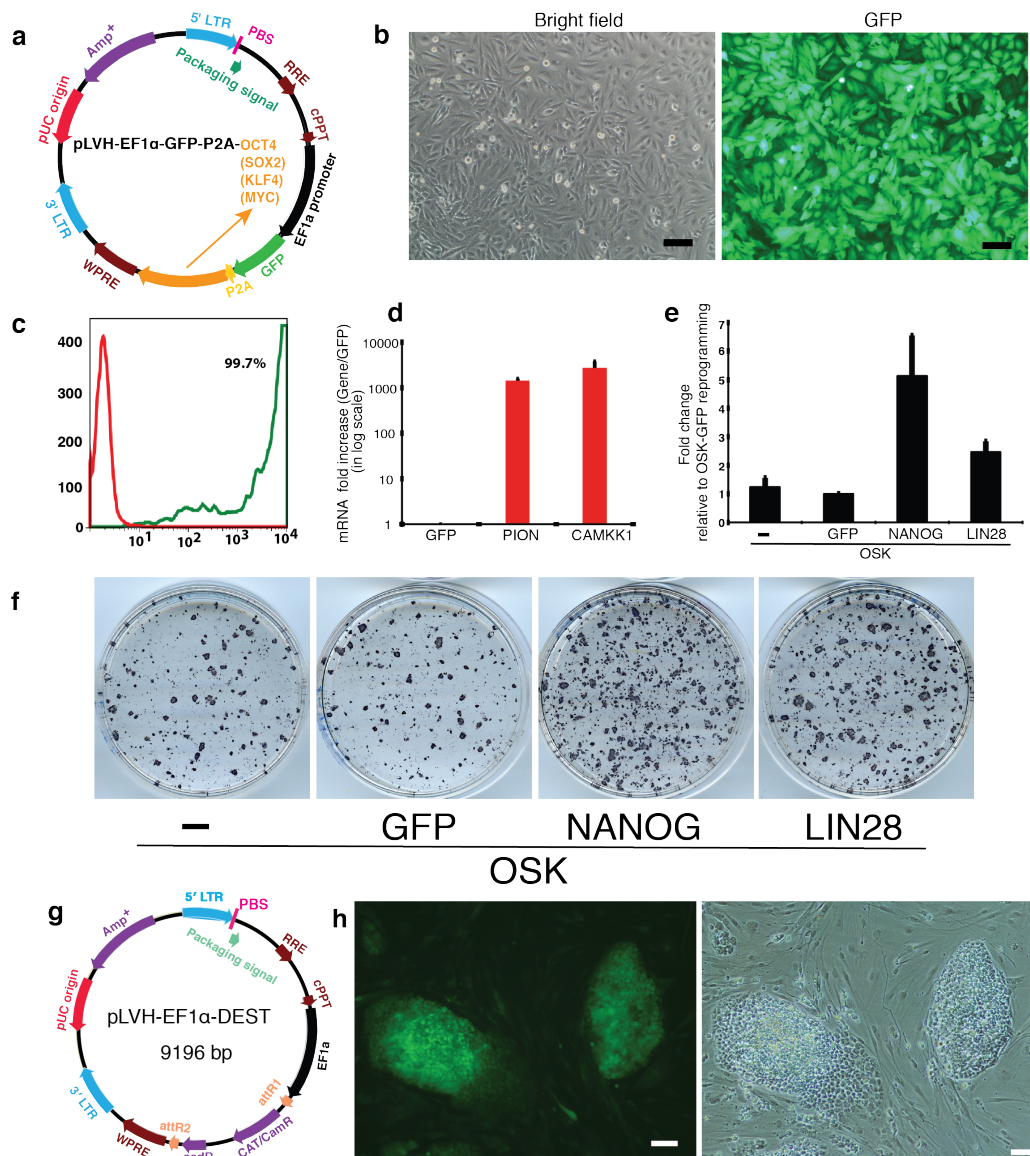

**Supplementary Figure 1 | Establishment of a sensitive reprogramming protocol capable of simultaneous evaluation of 22x*n* genes (plus two controls for each 22 genes) for their human reprogramming activities. (a) Map of the modified lentiviral reprogramming vectors with labels of the major vector components. (b) Representative images showing efficient transductions of human BJ cells in one well of a 24-well plate with 250  $\mu$ l of GFP lentiviral supernatant packaged in one well of a 6-well plate. GFP lentiviral construct is shown as in **a** without the second transgene after P2A. Bars, 100  $\mu$ m (c) Flow-cytometry histogram of cells in **b**. Green is the transduced cells, and red is the control of untransduced cells. (d) RT-qPCR estimations of mRNA levels of the two randomly selected kinase genes from the library delivered into BJ cells with 250  $\mu$ l of transgene viral supernatant packaged in a well of a 6-well plate (n=3, mean  $\pm$  sd). (e) Sensitive demonstration of reprogramming promoting activities of the two established minor reprogramming factors NANOG and LIN28 by our optimized small-vessel reprogramming protocol (n=3, mean  $\pm$  sd). (f) Representative images of reprogramming dishes stained for ALP from experiments in **e**. (g) Map of our lentiviral destination vector for Gateway cloning of cDNA library, with labels of the major vector components. (h) Reprogramming factors are not prematurely silenced in reprogramming colonies at day 16 of reprogramming as shown by the co-expression of GFP. Bar, 100  $\mu$ m.**

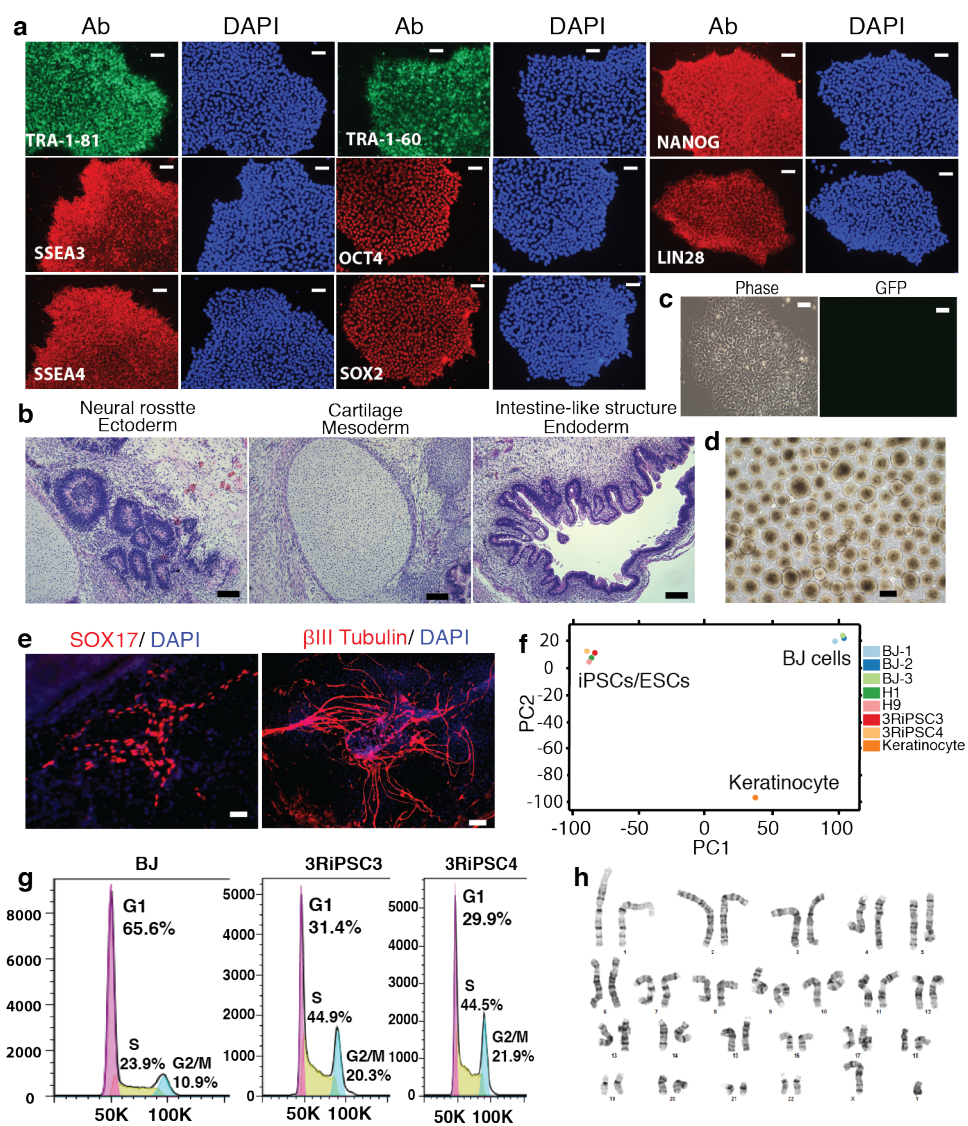

**Supplementary Figure 2 | BRD3R iPSCs are pluripotent.** (a) Representative images for immunostaining of BRD3R iPSCs (3RiPSC2) for the established pluripotent surface markers TRA-1-81, TRA-1-60, SSEA3 and SSEA4, and for the established pluripotent factors OCT4, SOX2, NANOG, and LIN28. Nuclei are visualized with DAPI staining. (b) H&E staining of representative teratoma sections demonstrating a capacity of BRD3R iPSCs (3RiPSC2) to generate cells representing all three embryonic germ layers. (c) Complete silencing of reprogramming factors in the established BRD3R iPSCs (3RiPSC2) as indicated by the absence of GFP expression, which is co-expressed with the reprogramming factors mediated by a 2A peptide. (d) Uniform embryoid bodies generated from BRD3R iPSCs (3RiPSC2). (e) Immunostaining of differentiated BRD3R iPSCs (3RiPSC2) demonstrating a capacity to form endoderm (SOX17) and ectoderm (beta-III tubulin). (f) Principal component analysis (PCA) of RNA-seq data for the 3RiPSCs in comparison with hESC and human somatic cells. (g) Flow cytometry histograms demonstrating successful resetting of the typical pluripotent cell cycle structure in the established BRD3R iPSCs. Note the shortened G1 phase in BRD3R iPSCs. Cell cycle analysis was performed using Dean-Jett-Fox model on FlowJo. (h) Normal karyotype of the established BRD3R iPSCs (3RiPSC4). Note the male karyotype in agreement with its origin of foreskin fibroblasts (BJ cells). Bars in a, c and e, 50  $\mu$ m; bars in d, 200  $\mu$ m; bar in b, 100  $\mu$ m.

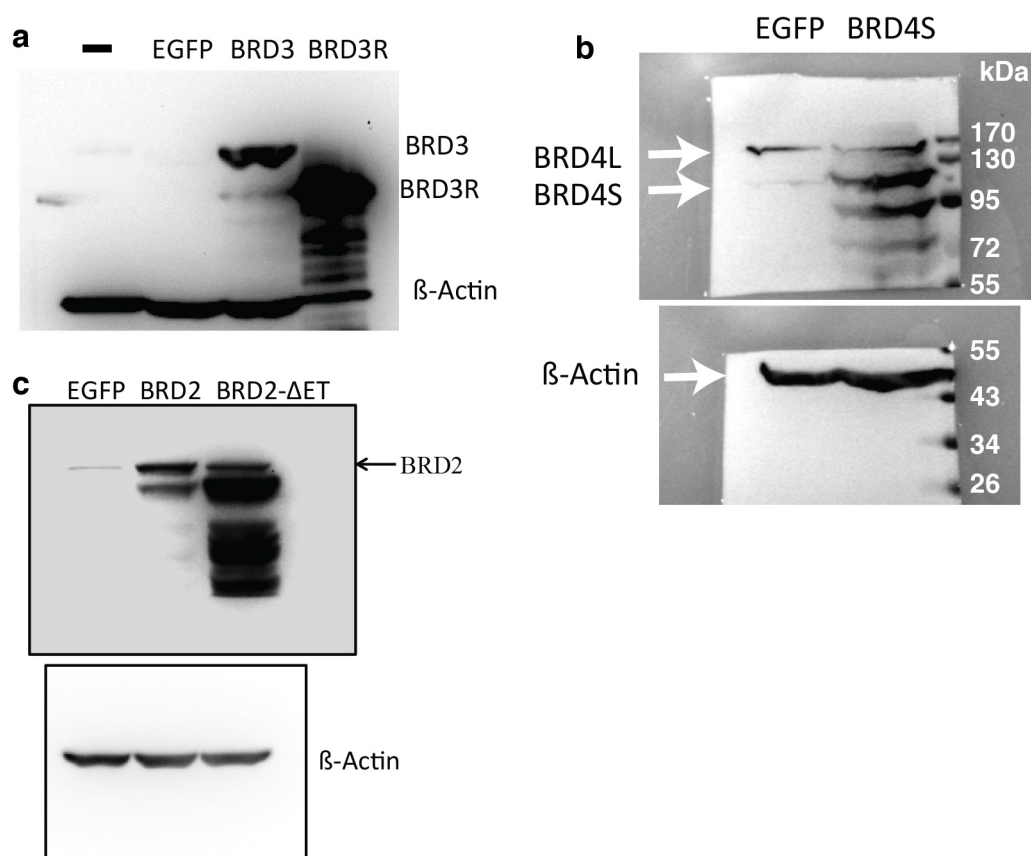

**Supplementary Figure 3 | Original membrane images for efficient expression of BET proteins with lentiviral constructs (related to 3h).** BJ cells were transduced with viruses indicated. **(a)** Overexpression of BRD3 (larger band as indicated) and BRD3R (smaller band as indicated) in BJ cells with lentiviral constructs. GFP virus was used as a control. -, Non-transduced BJ cells. **(b)** Overexpression of BRD4S in BJ cells mediated by lentiviral transduction. As reported, BRD4L is predominant in non-transduced cells (GFP lane). **(c)** Overexpression of BRD2 in BJ cells. BRD2-ΔET is a deletion control.

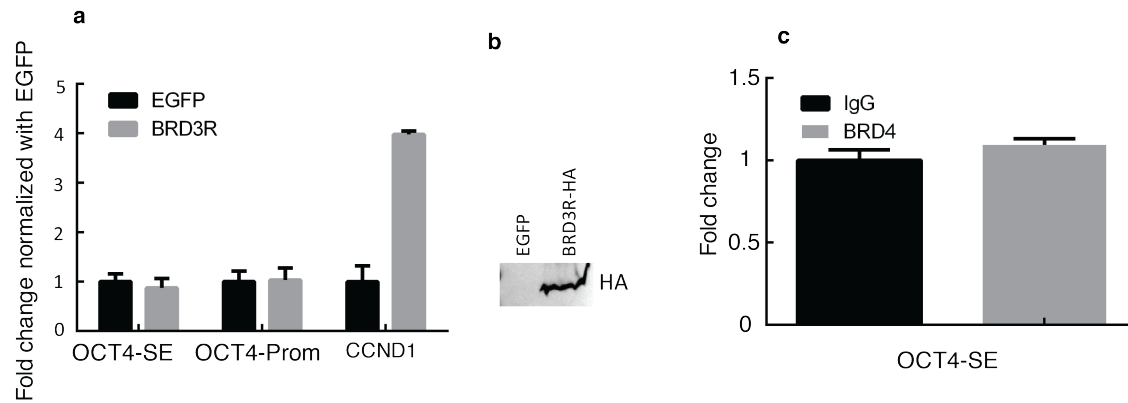

**Supplementary Figure 4 | BRD3R does not bind to OCT4 super enhancer and promoter in human somatic cells.** (a) ChIP-qPCR demonstrating that BRD3R does not bind to OCT4 super enhancer (OCT4-SE) and promoter (OCT4-Prom). Human somatic cells are transfected with HA-tagged BRD3R. ChIP was performed with HA antibody, and DNA was measured by quantitative PCR using published primers <sup>29</sup>. Signals are normalized to both input and IgG, and then compared with GFP controls. Cyclin D is used as a positive control using published primers <sup>41</sup>. (b) Western blots showing efficient expression of BRD3R. (c) BRD4 does not bind to *OCT4* super enhancer in non-pluripotent, somatic cells.

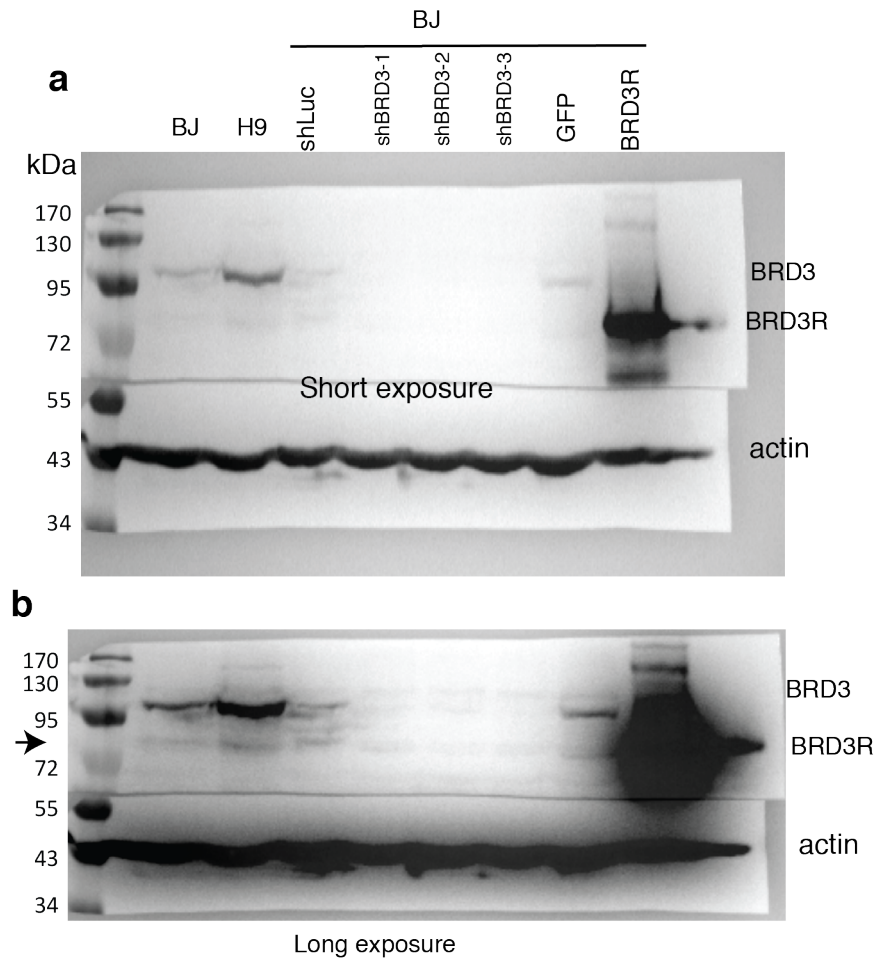

**Supplementary Figure 5 | Original western images showing higher expression of BRD3 and BRD3R in embryonic stem cells (related to Fig. 4d).** (a) Short exposure showing efficient expression of BRD3R using the lentiviral construct (BRD3R lane), and higher expression of BRD3 in hESC than in BJ (BJ and H9 lanes). (b) Long exposure showing endogenous BRD3R in both BJ cells and H9 cells (indicated by an arrow). Lower part in each panel is the lower portion of the same membrane blotted with actin antibody. shRNAs targeting the common regions of BRD3/BRD3R cDNAs efficiently reduced the expression of both BRD3 and BRD3R, indicating the specificity of the blots (Compare lanes shBRD3-1, shBRD3-2 and shBRD3-3 with other lanes). EZ-Run™ pre-stained *Rec* protein ladder (Fisher, BP-3603-500) was used.

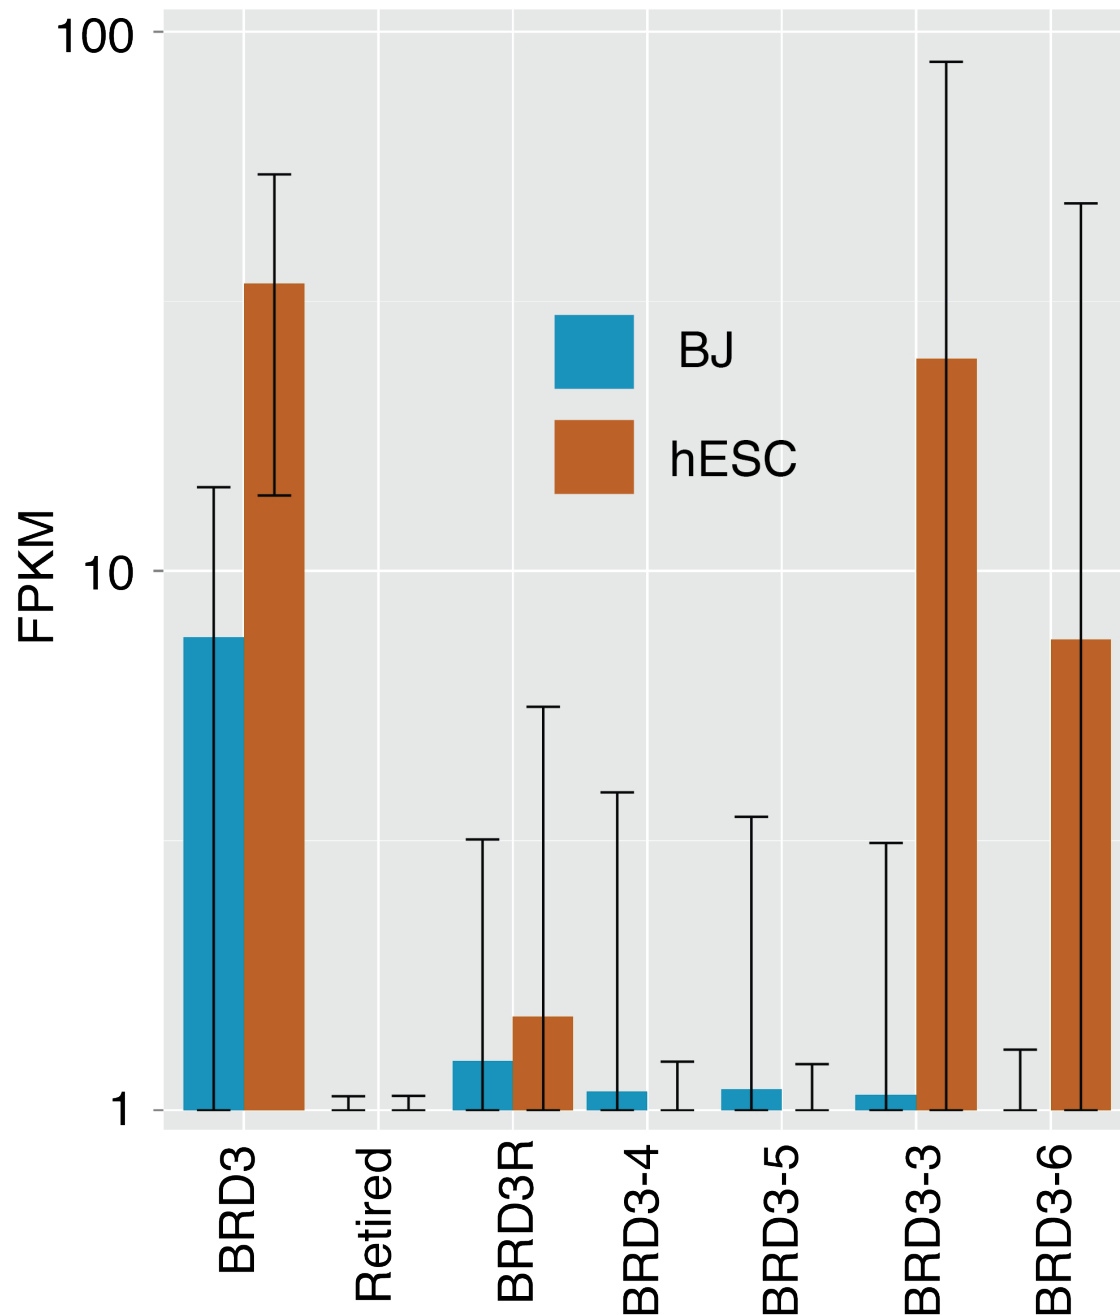

**Supplementary Figure 6 | *BRD3R* and *BRD3* have higher expression in human embryonic stem cells.** The seven *BRD3* transcripts were analyzed based on the RNA-seq data sets GSE36552 and GSE66798. Ensembl transcript ID for *BRD3* are: BRD3, ENST00000303407; Retired, ENST00000357885; BRD3R, ENST00000371834; BRD3-4, ENST00000371842; BRD3-5, ENST00000433041; BRD3-3, ENST00000473349; BRD3-6, ENST00000494743. Note that the retired transcript of *BRD3* demonstrates no FPKM. BJ RNA-seq, 3 replicates; RNA-seq for hESCs, 2 lines. Data are mean  $\pm$  sd.

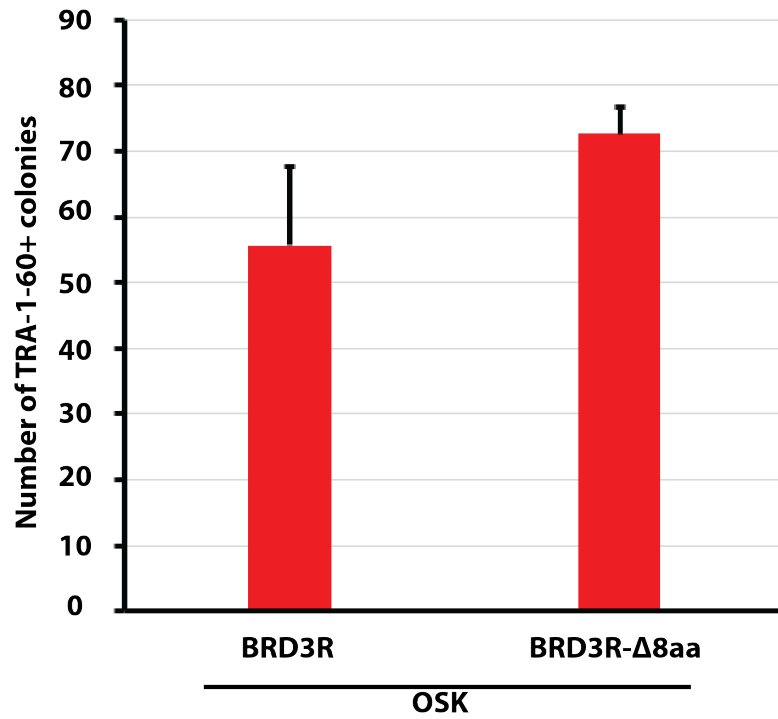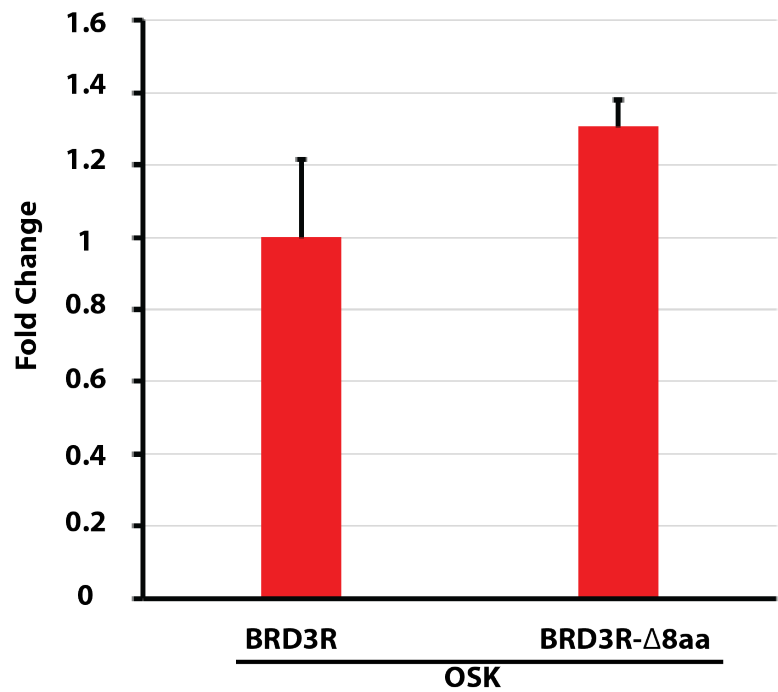

**Supplementary Figure 7 | the unique 8aa of BRD3R is not required for its reprogramming activity.** Data are represented as mean  $\pm$  sd, n = 3.

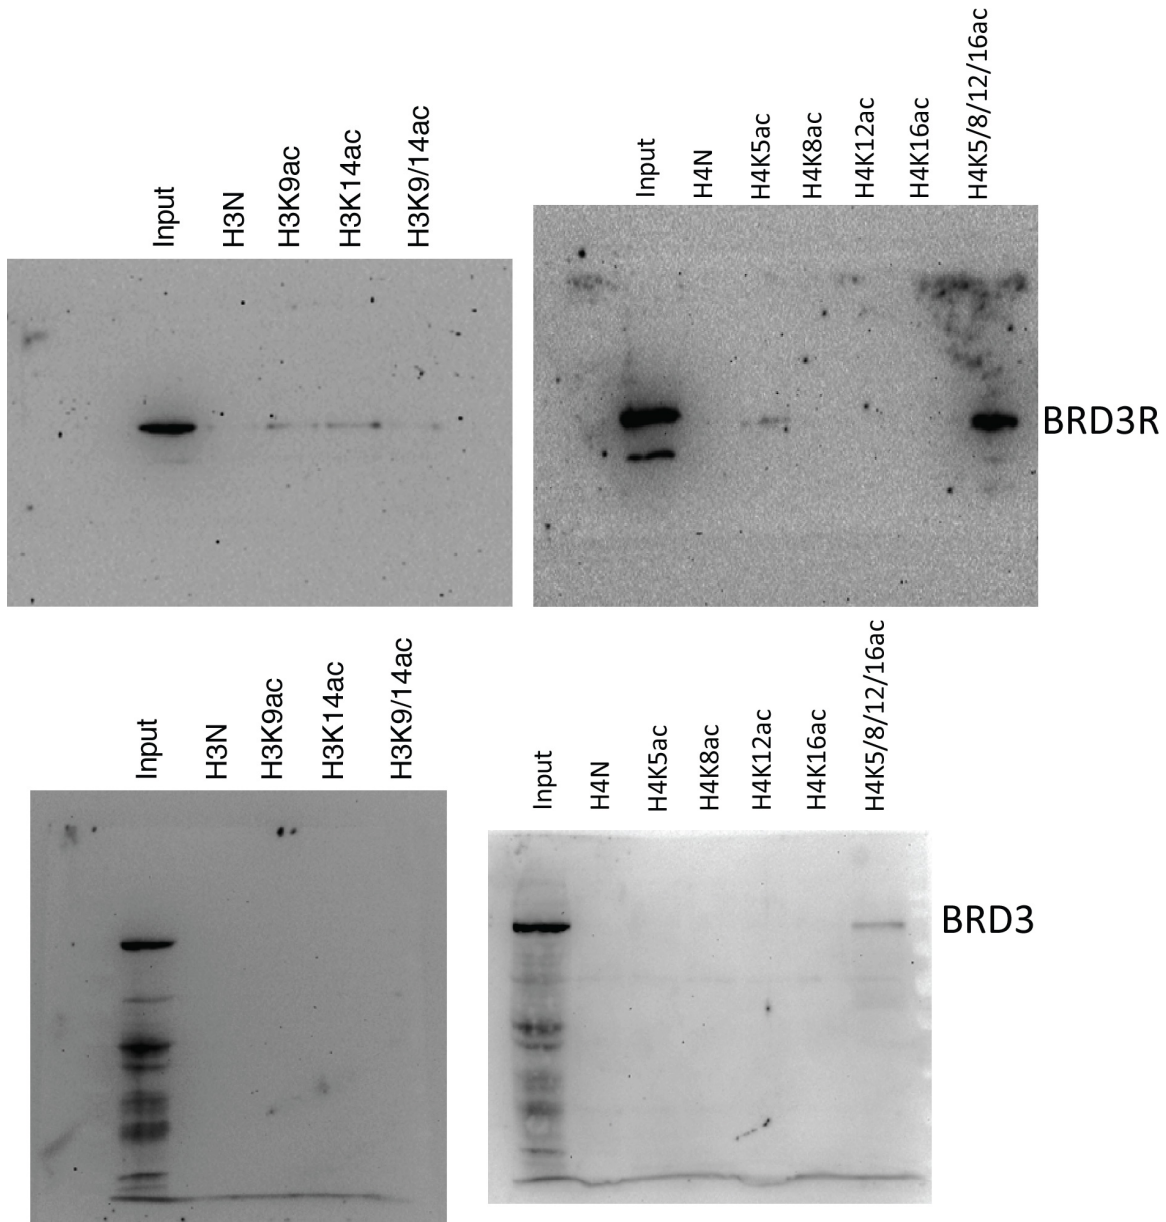

**Supplementary Figure 8 | Original membranes for the histone peptide pull-down experiments (related to Fig. 4h).** Peptides used for pull-down are indicated. BRD3R (upper membranes) and BRD3 (lower membranes) bands are indicated.



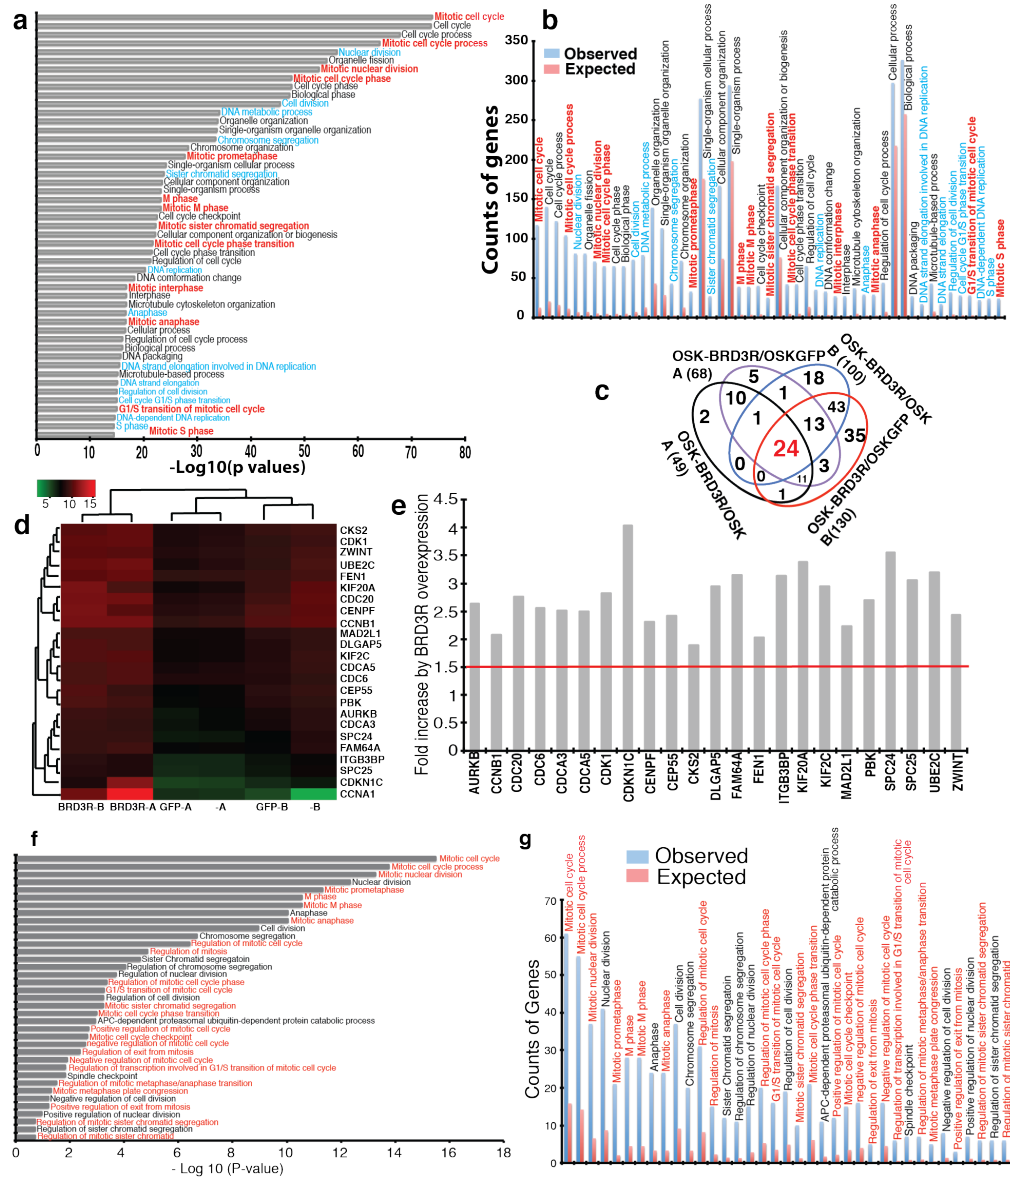

**Supplementary Figure 9 | BRD3R upregulates a large set of mitotic genes during early reprogramming.** (a) Top 49 GO terms ranked by  $p$  values (binomial test) for the list of genes upregulated ( $\geq 1.5\times$ ,  $p < 0.05$ , negative binomial test) by BRD3R overexpression on day 3 of reprogramming in the context of OSK reprogramming, in comparison to OSK-GFP-B control reprogramming (individual comparison of OSK-BRD3R-B/OSK-GFP-B). GO terms with keywords of “mitosis”, “M phase” or “mitotic” are highlighted in red. Many other GO terms (cyan) are apparently related to mitosis, for examples, “sister chromatid segregation” and “nuclear division”. (b) Observed and expected counts of genes for the top 49 GO terms listed in (a). (c) Venn diagram showing overlapping mitotic genes from the four lists of mitotic genes upregulated ( $> 1.5\times$ ,  $p < 0.05$ , negative binomial test) by BRD3R overexpression on day 3 of reprogramming among independent experiments. Total numbers of the upregulated mitotic genes are given in brackets for each comparison. (d) Heat map of expression levels as determined by RNA-seq for the 24 consistently upregulated mitotic genes (as identified in c) by BRD3R overexpression on day 3 of reprogramming in the context of OSK reprogramming. (e) Bar diagram showing representative individual fold increases of the 24 consistently up-regulated mitotic genes by BRD3R overexpression on day 3 of reprogramming (comparison OSK-BRD3R-B/OSK-GFP-B). The red line marks the level of 1.5-fold increase ( $p < 0.05$ , negative binomial test). *CCNA1* is not listed due to scale inconvenience. (f)  $-\text{Log}_{10}(P \text{ value})$  (binomial test) for the 24 mitotic and 13 mitosis-related GO terms for genes upregulated by BRD3R on day 3 of reprogramming (comparison OSK-BRD3R-A vs OSK-GFP-A). GO terms with key words of “mitotic”, “mitosis” or “M phase” are highlighted in red. Other GO terms listed are apparently related to mitosis, for example, “nuclear division”, “anaphase” and “chromosome segregation”. (g) Gene counts for the enriched mitotic and mitosis-related GO terms (blue bar) in (F). Expected counts of genes (red) for each GO term are shown in comparison.

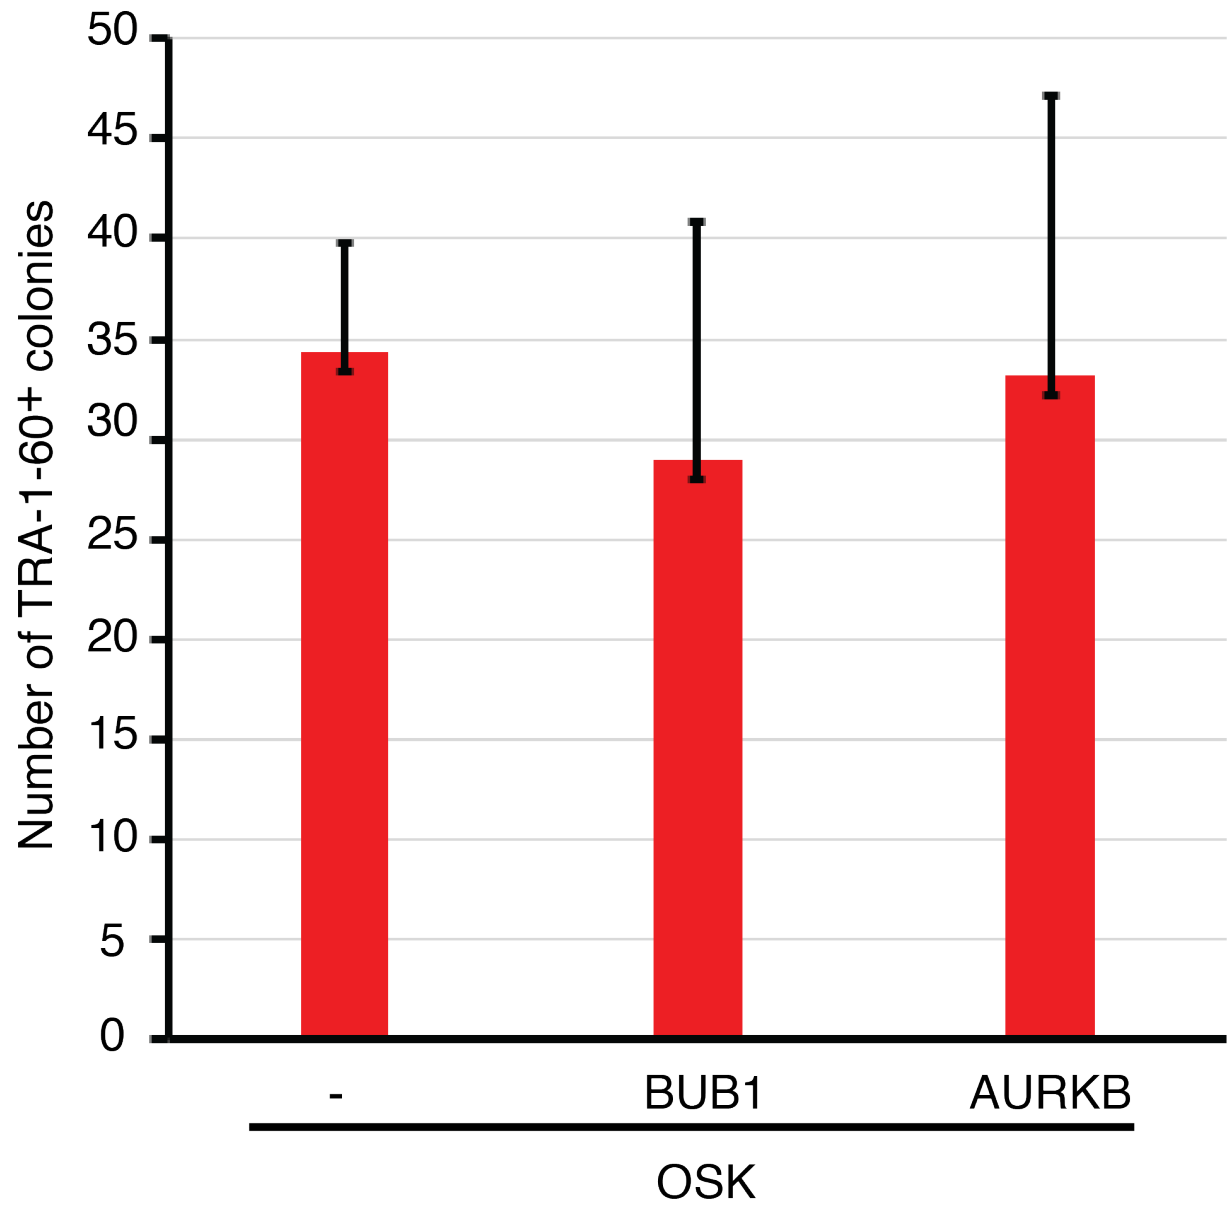

**Supplementary Figure 10 | BUB1 and AURKB do not enhance reprogramming.** Data are represented as mean  $\pm$  sd, n = 6.

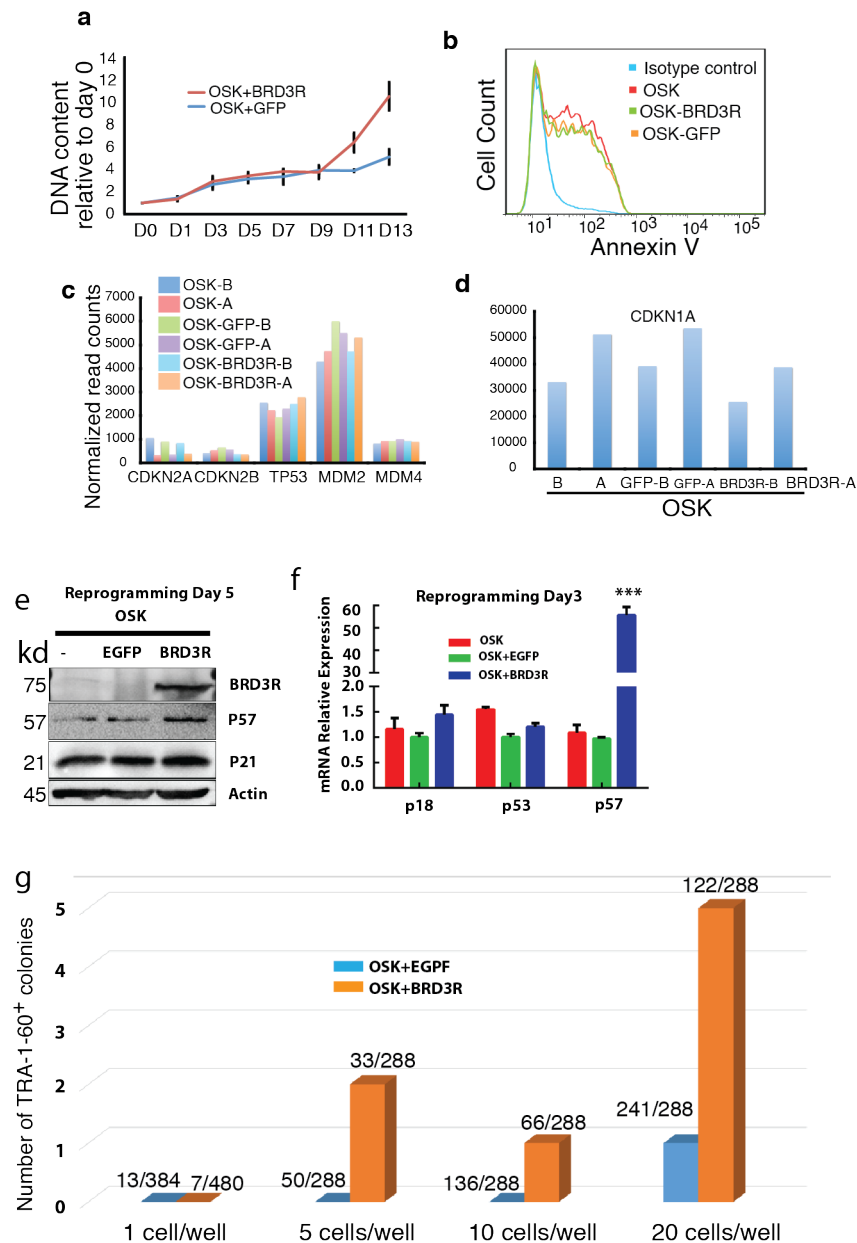

**Supplementary Figure 11 | BRD3R does not promote reprogramming by increasing proliferation of starting cells.** (a) Comparison of cell proliferation between BRD3R and control reprogramming, showing similar growth rate in early stages of reprogramming (before day 9). (b) Flow cytometry histograms showing similar apoptosis between BRD3R and control reprogramming (day 5). (c, d) Normalized read counts of RNA-seq data for members of ARF-p53 DNA surveillance pathway. RNA samples were prepared from day-3 reprogramming BJ cells transduced with viral particles of reprogramming factors as indicated. (e) Western analysis of cell cycle inhibitors in reprogramming cells. (f) Real time PCR analyses of cell cycle controllers of reprogramming cells. \*\*\*,  $p < 0.001$  (t test). (g) Clonal reprogramming of human BJ cells. Numbers above each bar are presented as (number of wells with survival cells)/(total number of wells seeded).

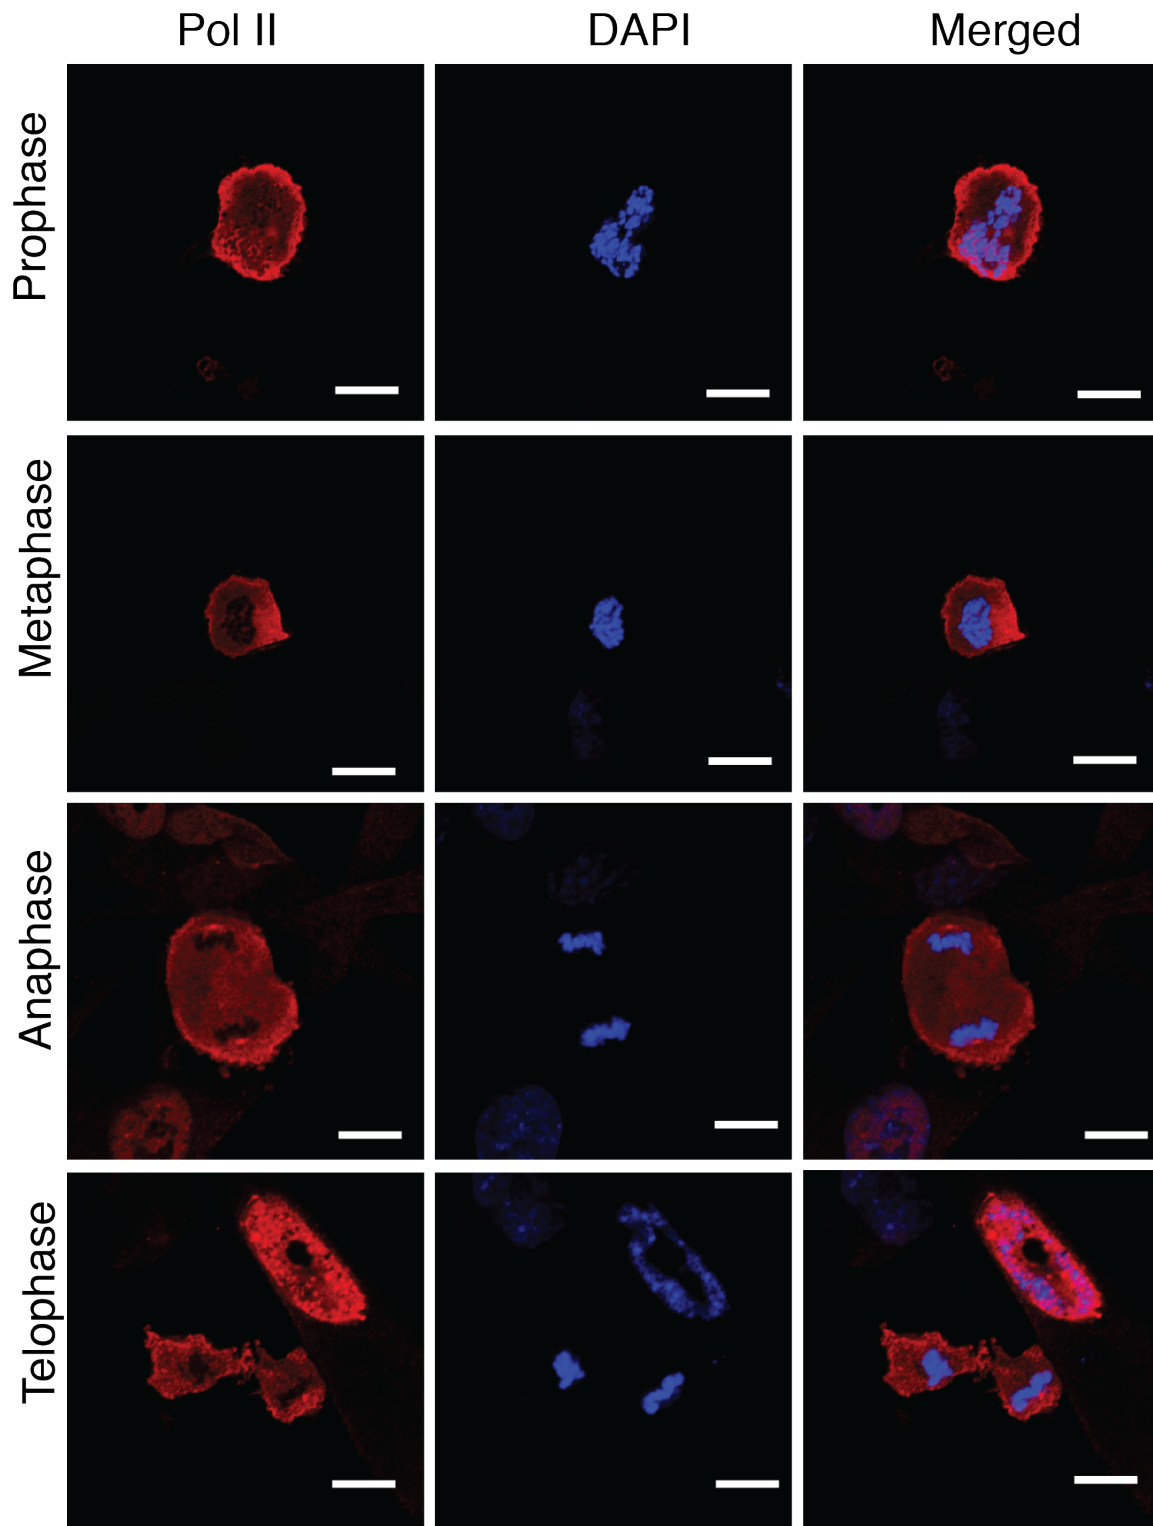

**Supplementary Figure 12 | Pol II dissociates from mitotic chromatin as revealed by confocal imaging.** A control for interphase chromatin can be found in the upper parts of each panel in the telophase row. It is apparent that Pol II associates with the interphase chromatin. Mitotic phases are indicated; Pol II antibody used is CTD4H8 (Upstate). Chromatin is visualized by DAPI staining. Scale bars, 10  $\mu\text{m}$ .

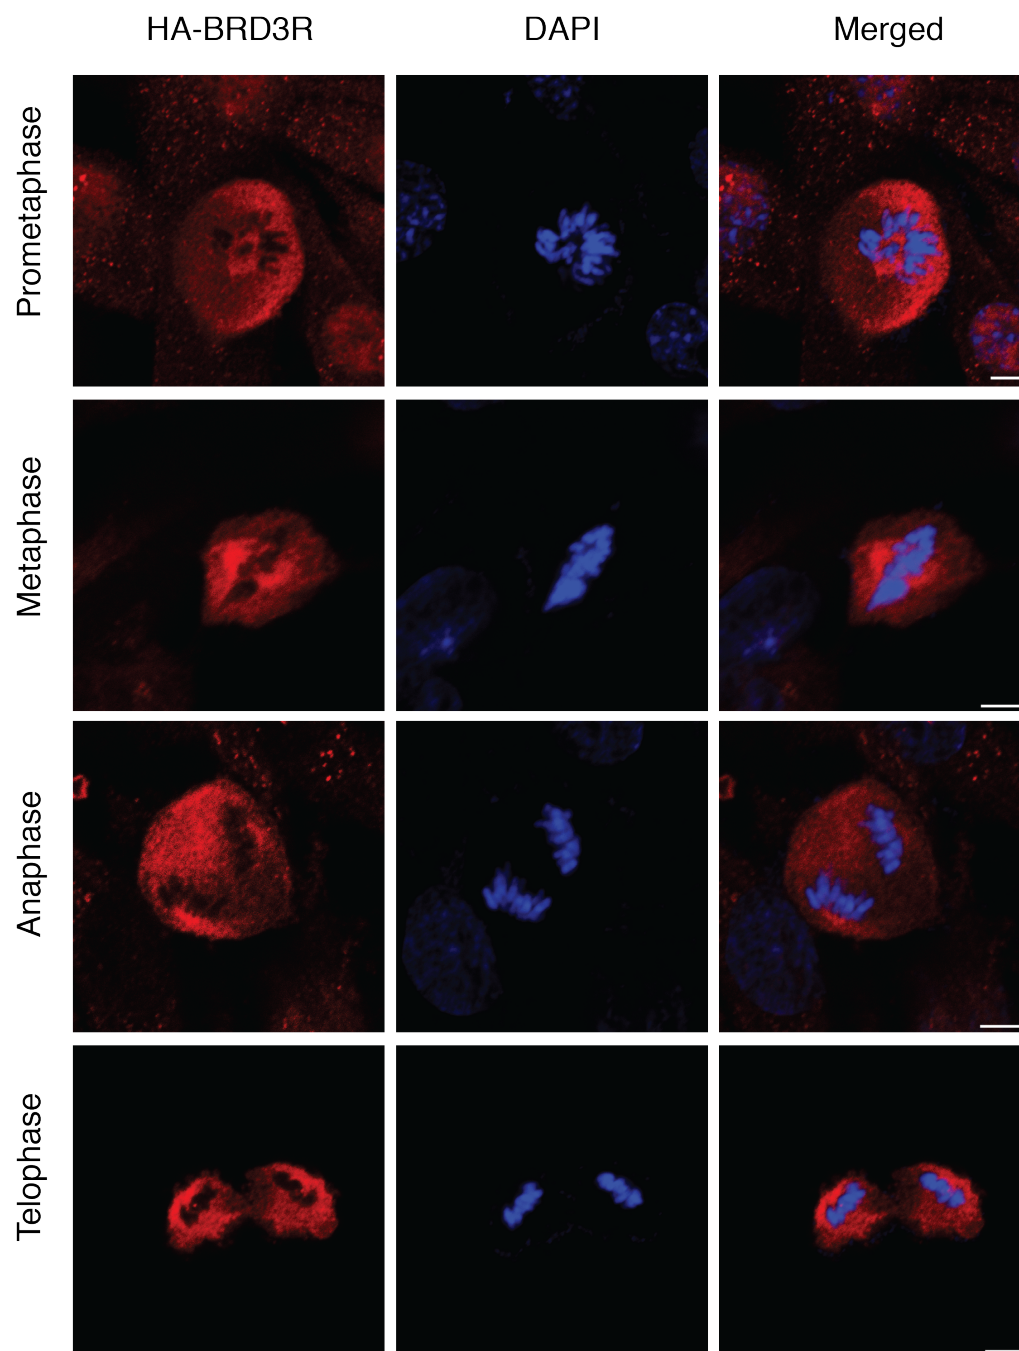

**Supplementary Figure 13 | JQ1 treatment displaces BRD3R during reprogramming at all phases of mitosis.** Bar, 5  $\mu\text{m}$ . Reprogramming cells were treated with JQ1 for 6 hours at 500 nM. Chromatins were visualized by DAPI staining.

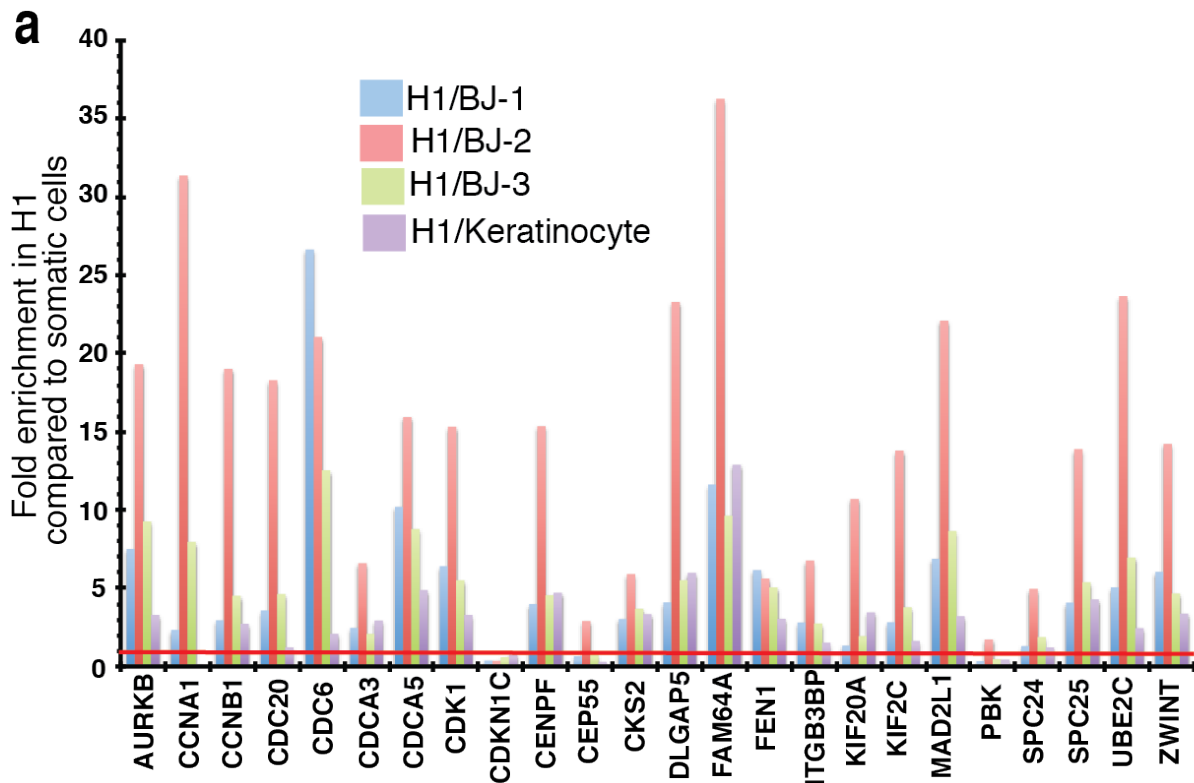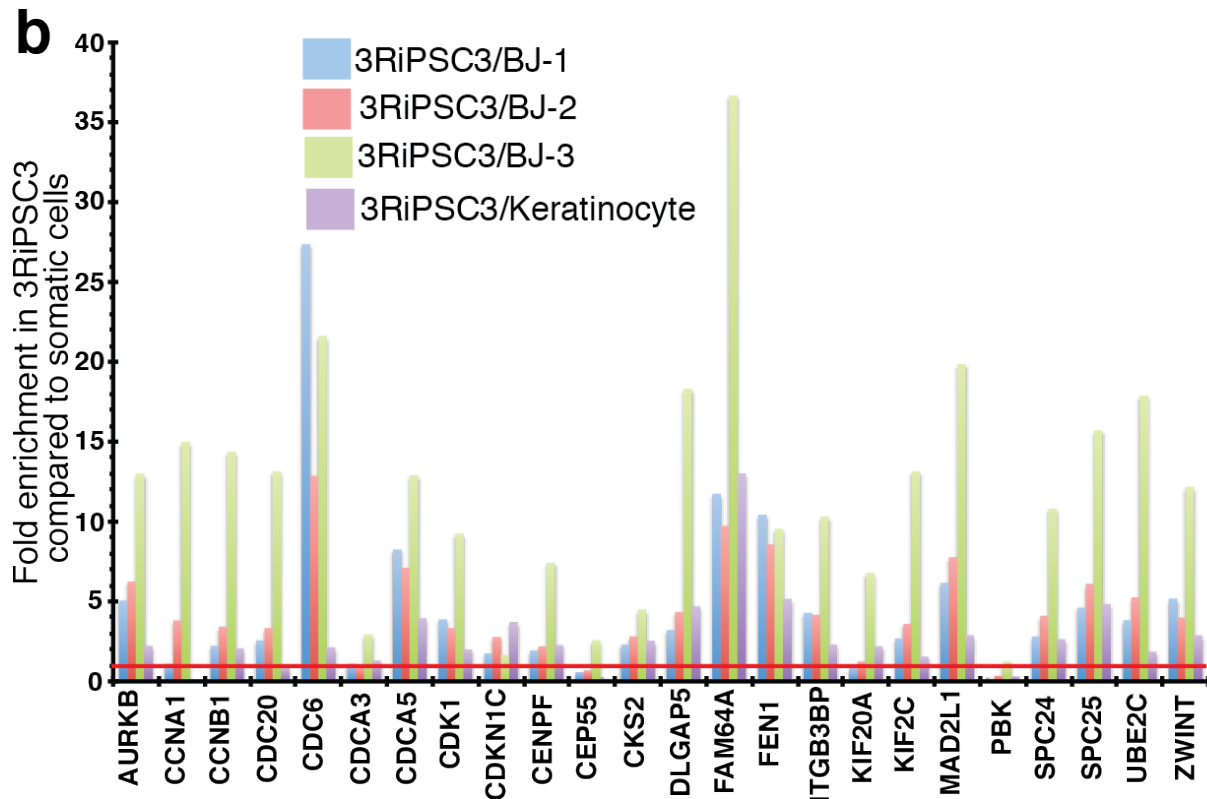

**Supplementary Figure 14 | BRD3R-regulated mitotic genes display elevated expression in human embryonic stem cells and human iPSCs. (a,b)** Fold enrichment of the 24 BRD3R-regulated mitotic genes in human embryonic stem cells (H1) and human iPSC (3RiPSC3) as compared to BJ human fibroblast and human keratinocyte based on RNA-seq data. Red line marks the no-change level (1 fold change).

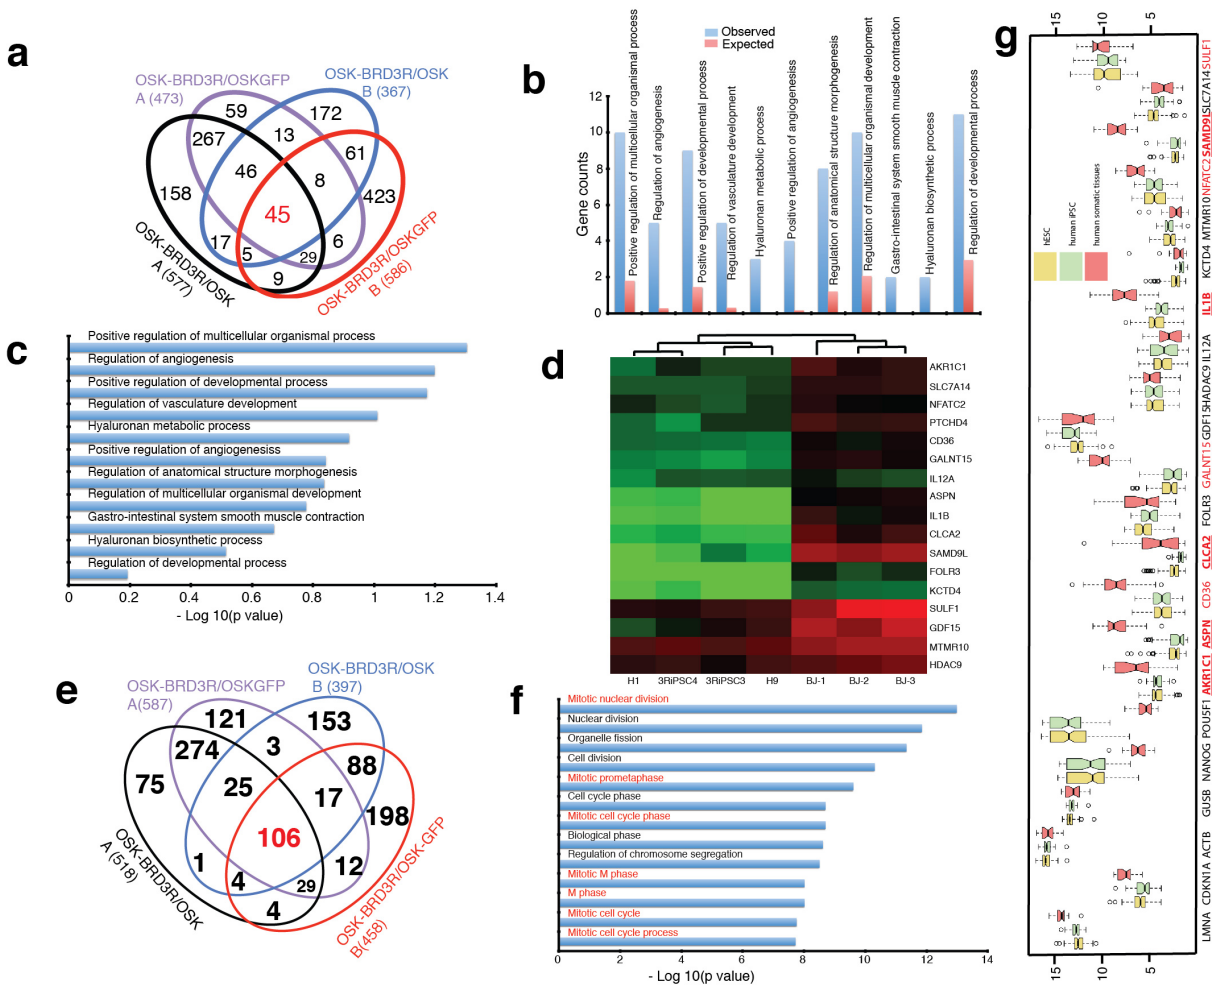

**Supplementary Figure 15 | BRD3R downregulates 17 fibroblast-enriched genes in early stages of reprogramming, but these genes lack a unifying GO term. (a)** Venn diagram revealing 45 genes that were consistently downregulated by BRD3R on day 3 of reprogramming. Numbers in brackets are total number of genes downregulated by BRD3R overexpression by at least  $1.5\times$  ( $p < 0.05$ , negative binomial test) as compared to control reprogramming. **(b)** Observed and expected counts of genes for all GO terms enriched for the list of genes consistently downregulated by BRD3R during reprogramming. **(c)**  $-\log_{10}(p \text{ value})$  (binomial test) for the enriched GO terms for the list of genes consistently downregulated by BRD3R (45 genes). Note the difference in  $-\log_{10}(p \text{ value})$  from that of the BRD3R-upregulated genes shown in **f**. **(d)** Heat map displaying that 17 of the BRD3R-downregulated genes are fibroblast-enriched as compared to PSCs. **(e)** Venn diagram revealing 106 genes consistently upregulated by BRD3R on day 3 of reprogramming ( $\geq 1.5\times$ ,  $p < 0.05$ , negative binomial test). **(f)**  $-\log_{10}(p \text{ value})$  (binomial test) for the top-13 enriched GO terms for the list of genes consistently upregulated by BRD3R (106 genes, in e). The unifying mitotic GO terms are highlighted in red. Other top GO terms are apparently mitosis-related, or overlap with mitotic GO terms. **(g)** Boxplot showing that only five of the 17 fibroblast-enriched genes are enriched in other somatic cells compared to PSCs. Boxplot is based on dataset GSE34200 ( $\log_2$  expression), which is microarray dataset for the 21 hESCs (132 microarray samples), 8 human iPSCs (46 microarray samples) and 20 human tissues. The gene *PTCHD4* is not available in the dataset GSE34200. Genes with higher expression in human somatic tissues are highlighted in red (note the position of the orange boxes). The five genes that are also enriched in human keratinocyte (based on RNA-seq, data not shown) are in boldface and underlined. Left and right box border represent 75% and 25%, and middle vertical lines indicate the median value. Whiskers indicate the upper and lower extremes.

## Supplementary tables

Supplementary Table 1. Summary for the primary screen of the 89 human kinase cDNAs

| Clone ID | Addgene | gene      | FC    | SD    | n | Clone ID | Addgene | gene     | FC    | SD    | n |
|----------|---------|-----------|-------|-------|---|----------|---------|----------|-------|-------|---|
| L1       | P1A1    | CAMK2B    | 1.145 |       | 1 | L48      | P1D12   | TSSK2    | 3.000 |       | 1 |
| L10      | P1A10   | CSNK2B    | 1.747 |       | 1 | L49      | P1E1    | RAF1     | 1.326 |       | 1 |
| L11      | P1A11   | PRKAB1    | 1.072 |       | 1 | L5       | P1A5    | CRKL     | 1.352 |       | 1 |
| L12      | P1A12   | LOC389599 | 0.944 |       | 1 | L50      | P1E2    | BMP2KL   | 4.087 |       | 1 |
| L13      | P1B1    | CAMKK1    | 2.603 | 1.105 | 3 | L51      | P1E3    | CSNK1G3  | 1.174 |       | 1 |
| L14      | P1B2    | DYRK4     | 0.934 |       | 1 | L52      | P1E4    | ACVR2B   | 1.217 |       | 1 |
| L15      | P1B3    | CIB1      | 1.786 |       | 1 | L53      | P1E5    | GRK7     | 2.891 |       | 1 |
| L16      | P1B4    | GK2       | 0.993 |       | 1 | L54      | P1E6    | PAK6     | 1.790 | 1.503 | 3 |
| L17      | P1B5    | PRKCI     | 1.395 |       | 1 | L55      | P1E7    | MARK2    | 0.978 |       | 1 |
| L18      | P1B6    | FLJ25006  | 0.872 |       | 1 | L56      | P1E8    | SNRK     | 2.318 | 0.964 | 2 |
| L19      | P1B7    | CDK3      | 1.120 | 0.183 | 3 | L560     |         | SGK494   | 1.194 | 0.332 | 3 |
| L2       | P1A2    | NEK3      | 1.474 |       | 1 | L57      | P1E9    | MAP2K1   | 3.023 | 0.675 | 2 |
| L20      | P1B8    | PION      | 2.108 | 0.207 | 3 | L58      | P1E10   | PLXNB2   | 2.370 | 0.170 | 2 |
| L21      | P1B9    | STK19     | 0.950 | 0.192 | 3 | L59      | P1E11   | CAMK2A   | 2.643 | 2.272 | 2 |
| L22      | P1B10   | GRK6      | 1.099 |       | 1 | L6       | P1A6    | CSNK1A1  | 1.128 |       | 1 |
| L23      | P1B11   | LOC442075 | 1.086 |       | 1 | L60      | P1E12   | CAMK2G   | 1.883 | 0.809 | 3 |
| L24      | P1B12   | LOC390877 | 0.770 |       | 1 | L61      | P1F1    | BRD3     | 7.989 | 6.026 | 2 |
| L25      | P1C1    | AURKC     | 0.638 |       | 1 | L62      | P1F2    | MPP7     | 3.441 | 1.498 | 2 |
| L26      | P1C2    | FLJ23356  | 0.977 |       | 1 | L63      | P1F3    | IRAK2    | 1.845 | 0.959 | 3 |
| L27      | P1C3    | PRKAR1B   | 0.997 |       | 1 | L64      | P1F4    | PRKG1    | 2.670 | 0.820 | 2 |
| L28      | P1C4    | FLJ40852  | 0.990 |       | 1 | L65      | P1F5    | PRKFB1   | 2.848 | 2.690 | 2 |
| L29      | P1C5    | SGK2      | 1.509 | 0.681 | 3 | L66      | P1F6    | IPPK     | 2.430 | 1.867 | 2 |
| L3       | P1A3    | ACVR1     | 1.178 |       | 1 | L67      | P1F7    | MPP6     | 1.525 | 1.025 | 2 |
| L30      | P1C6    | TESK1     | 0.760 |       | 1 | L68      | P1F8    | MPP4     | 2.282 | 1.016 | 2 |
| L31      | P1C7    | GUK1      | 1.611 | 0.621 | 3 | L69      | P1F9    | NEK8     | 3.182 | 2.571 | 2 |
| L32      | P1C8    | DCK       | 1.130 |       | 1 | L7       | P1A7    | CCL4     | 1.528 | 0.192 | 3 |
| L33      | P1C9    | CDKL4     | 3.870 |       | 1 | L70      | P1F10   | PANK4    | 2.052 | 1.694 | 2 |
| L34      | P1C10   | PRKX      | 2.348 |       | 1 | L71      | P1F11   | MAPK8    | 1.486 | 0.829 | 3 |
| L35      | P1C11   | PANK3     | 2.239 |       | 1 | L72      | P1F12   | CDKL2    | 1.734 | 0.730 | 2 |
| L36      | P1C12   | PHKG1     | 1.522 |       | 1 | L73      | P1G1    | CAMKK2   | 1.652 | 0.569 | 2 |
| L37      | P1D1    | CIB4      | 2.543 |       | 1 | L74      | P1G2    | BMP2K    | 1.874 | 0.891 | 3 |
| L38      | P1D2    | PKDCC     | 5.065 |       | 1 | L75      | P1G3    | PRKCC    | 4.573 | 3.433 | 2 |
| L39      | P1D3    | NUAK2     | 2.674 |       | 1 | L76      | P1G4    | LIMK2    | 3.491 | 3.548 | 2 |
| L4       | P1A4    | NME1-NME2 | 1.016 |       | 1 | L77      | P1G5    | MAPKAPK2 | 1.338 | 0.561 | 3 |
| L40      | P1D4    | CDKL1     | 1.735 | 0.526 | 3 | L78      | P1G6    | PGK1     | 2.532 | 2.783 | 2 |
| L41      | P1D5    | DAPK2     | 1.674 |       | 1 | L79      | P1G7    | CHKA     | 1.365 | 0.864 | 3 |
| L411     | P5E9    | PBK       | 1.254 | 0.624 | 3 | L8       | P1A8    | STK33    | 1.477 |       | 1 |
| L42      | P1D6    | LOC649228 | 1.435 |       | 1 | L80      | P1G8    | CDC2L6   | 2.273 | 2.443 | 2 |
| L43      | P1D7    | NME2      | 2.175 | 1.116 | 3 | L81      | P1G9    | ADRBK1   | 1.145 | 0.350 | 3 |
| L436     | P5E4    | CDK2      | 1.457 |       | 1 | L82      | P1G10   | MPP3     | 2.984 | 2.497 | 2 |
| L44      | P1D8    | ITGB1BP3  | 3.652 |       | 1 | L83      | P1G11   | BRSK2    | 4.559 | 2.745 | 2 |
| L45      | P1D9    | LOC652779 | 4.913 |       | 1 | L84      | P1G12   | UHMK1    | 5.750 |       | 1 |
| L46      | P1D10   | NEK7      | 2.826 |       | 1 | L9       | P1A9    | C1orf57  | 1.089 |       | 1 |
| L47      | P1D11   | SLAMF6    | 2.674 |       | 1 | L93      | P1H9    | RIPK1    | 0.990 | 0.453 | 3 |
|          |         |           |       |       |   | L94      | P1H10   | KSR      | 1.394 | 0.734 | 3 |

**Notes:** FC, fold change; SD, standard deviation; n, number of repeats; Addgene, listed in this column is the Addgene plate locations. FC is based on the number of ALP<sup>+</sup> colonies.



Supplementary Table 2. Summary of secondary screen of candidate human kinase cDNAs for reprogramming activity

| treatment ID | Addgene | Gene symbol | FC to GFP    |              | Average FC | SD     |
|--------------|---------|-------------|--------------|--------------|------------|--------|
|              |         |             | Experiment 1 | Experiment 2 |            |        |
| 3F           | N/A     | N/A         | 1.8079       | 1.8187       | 1.8133     | 0.0076 |
| GFP + 3F     | NA      | N/A         | 1            | 1            | 1          | 0      |
| L10 + 3F     | P1A10   | CSNK2B      | 2.9470       | 3.3859       | 3.1665     | 0.3104 |
| L13 + 3F     | P1B1    | CAMKK1      | 2.5166       | 2.5556       | 2.5361     | 0.0276 |
| L15 + 3F     | P1B3    | CIB1        | 2.9735       | 3.3158       | 3.1447     | 0.2420 |
| L20 + 3F     | P1B8    | PION        | 2.7616       | 2.7602       | 2.7609     | 0.0009 |
| L33 + 3F     | P1C9    | CDKL4       | 2.9337       | 2.5731       | 2.7534     | 0.2550 |
| L38 + 3F     | P1D2    | PKDCC       | 1.6026       | 1.2105       | 1.4066     | 0.2772 |
| L44 + 3F     | P1D8    | ITGB1BP3    | 3.0132       | 0.7661       | 1.8897     | 1.5889 |
| L45 + 3F     | P1D9    | LOC652779   | 3.1854       | 2.0701       | 2.6278     | 0.7886 |
| L50 + 3F     | P1E2    | BMP2KL      | 2.2053       | 1.2807       | 1.7429     | 0.6538 |
| L61 + 3F     | P1F1    | BRD3        | 33.8823      | 21.32        | 27.6012    | 8.8829 |
| L84 + 3F     | P1G12   | UHMK1       | 1.8873       | 1.6797       | 1.7835     | 0.1468 |

**Notes:** The reprogramming with each candidate gene was repeated once in the secondary screen. FC, fold change compared with OSK-GFP control reprogramming. Reprogramming activity was evaluated by numbers of ALP<sup>+</sup> colonies on day 25 of reprogramming with E8 system. Addgene, Addgene plate location number; SD, standard deviation; 3F, 3 factors: OCT4, SOX2 and KLF4.

Supplementary Table 3. Primers used in this study.

| primer name    | sequence                                                          | gene name | Accession #    | application      |
|----------------|-------------------------------------------------------------------|-----------|----------------|------------------|
| hAURKB-F2      | AAGGAGCTGCAGAAGAGCTG                                              | AURKB     | NM_001284526   | qPCR             |
| hAURKB-R2      | CCTTGAGCCCTAAGAGCAGA                                              |           |                |                  |
| hCDK1-F1       | CTGGGGTCAGCTCGTTACTC                                              | CDK1      | NM_001786.     | qPCR             |
| hCDK1-R1       | TCTGAATCCCCATGGAAAAG                                              |           |                |                  |
| hCKS2-F1       | CACTACGAGTACCGGCATGTT                                             | CKS2      | NM_001827      | qPCR             |
| hCKS2-R1       | TGTTGGACACCAAGTCTCCTC                                             |           |                |                  |
| hCLSPN-F2      | AAGGAGCGAATTGAACGAGA                                              | CLSPN     | NM_022111      | qPCR             |
| hCLSPN-R2      | TGCAGTGCTTTGGCTGTAAC                                              |           |                |                  |
| hDLGAP5-F2     | CGTCCAGACCGAGTGTCTT                                               | DLGAP5    | NM_014750.     | qPCR             |
| hDLGAP5-R2     | ATCCTTCCTGTGTCGACTGG                                              |           |                |                  |
| hFAM83D-F1     | CAGTGGTCATGGACGTGTTC                                              | FAM83D    | NM_030919.     | qPCR             |
| hFAM83D-R1     | CAACTCCCTGTTTCTGCAT                                               |           |                |                  |
| hNCAPH-F2      | GGCTCAGAACCTCTCCATACCT                                            | NCAPH     | NM_001281710   | qPCR             |
| hNCAPH-R2      | GAGGTCCTCTGTCTCCAGT                                               |           |                |                  |
| hNUSAP1-F2     | AAGCGCTCTGCTATCTCTGC                                              | NUSAP1    | NM_016359      | qPCR             |
| hNUSAP1-R2     | TTCTGGCTGGAGTCTGGTC                                               |           |                |                  |
| hSPC25-F2      | TTCAAAAAGTACGGACACCTCCT                                           | SPC25     | NM_020675      | qPCR             |
| hSPC25-R2      | CTCAACCATTCTTCTTCTTCC                                             |           |                |                  |
| hTACC3-F2      | TTTCGCCACCAGAAGTTACC                                              | TACC3     | NM_006342      | qPCR             |
| hTACC3-R2      | TCATAGCTTTGGCCAGGTTT                                              |           |                |                  |
| hUBE2C-F1      | ACCCAACATTGATAGTCCCTTG                                            | UBE2C     | NM_007019      | qPCR             |
| hUBE2C-R1      | GCTGGTGACCTGCTTTGAGTAG                                            |           |                |                  |
| 3R1F           | GCAGAGATCATTCTTGACCTGTGGAG                                        | BRD3R     | BC032124.2     | qPCR             |
| 3R1R           | AGCCCTTGGCCAGGAAACAA                                              |           |                |                  |
| 3LF            | CTTCAAATGCTAACCCGATGAC                                            | BRD3      | NM_007371.3    | qPCR             |
| 3LR            | TCTTTCTCGAGCTATCGACCAG                                            |           |                |                  |
| BRD3iso2HA-F   | GTTCCAGATTACGCTATGTCCACCGCCACGACA                                 | BRD3R     | BC032124.2     | cloning          |
| BRD3iso2HA-R   | ATCGTATGGGTACATAGCCTGCTTTTTTGTACAAACTTG                           |           |                |                  |
| BRD2-F         | ATGCTGCAAAACGTGACTCCCCACA                                         | BRD2      | NM_001113182.2 | cloning          |
| BRD2-R         | TTAGCCTGAGTCTGAATCACTGGTGTC                                       |           |                |                  |
| 3DF            | ATGTCCACCGCCACGACAGTCGC                                           | BRD3      | NM_007371.3    | cloning          |
| 3DR            | TCATTCTGAGTCACTGCTGTCAGAGCT                                       |           |                |                  |
| hpion-1-F      | TCTCTGCCTGCCATTTCATT                                              | PION      | NM_017439.3    | qPCR             |
| hpion-1-R      | GCACTGAGGAATGTGGCAAT                                              |           |                |                  |
| hCAMKK1-1-F    | GCGTCAGCAACCAGTTTGGAG                                             | CAMKK1    | NM_172207.2    | qPCR             |
| hCAMKK1-1-R    | AGTGGCCCATACATCCAAGG                                              |           |                |                  |
| hm-GAPDH-hao-F | CCTTCATTGACCTCAACTACATGG                                          | GAPDH     | NM_001256799.1 | qPCR             |
| hm-GAPDH-hao-R | TCGCTCCTGGAAGATGGTGATGGG                                          |           |                |                  |
| attR1-F        | CAACAAGTTTGTACAAAAAAGCTGAACG                                      |           |                | cloning          |
| attrR2-stop-R  | TCAACTAGTTACTAAACCACTTTGTACAAGAAAGCTGAACGAGA                      |           |                | cloning          |
| 3R2R           | TCAAACTCCACAGGTCAAGAAATGATC                                       | BRD3R     | BC032124.2     | cloning/PCR      |
| BRD3S-sh3sn    | CTAGGAACCTCTGTAATTGTTTCTGGCTCGAGCCAGGAAACAA<br>TTACAGAGGTTCTTTTTT | BRD3R     | BC032124.2     | Cloning<br>shRNA |
| BRD3S-sh3as    | AAAAAAGAACCTCTGTAATTGTTTCTGGCTCGAGCCAGGAAAC<br>AATTACAGAGGTTT     |           |                |                  |

Notes: F in primer names, forward primers; R in primer names, reverse primers.

Supplementary Table 4. Histone tails used for peptide pull-down experiments

| Description of histone tails                     | Sequence of histone tails                            |
|--------------------------------------------------|------------------------------------------------------|
| Histone H3 N-terminal Peptide, Biotinylated      | ARTKQTARKSTGGKAPRKQL-K(Biot)-NH <sub>2</sub>         |
| Histone H3 K9ac Peptide, Biotinylated            | ARTKQTARK(Ac)STGGKAPRKQL-K(Biot)-NH <sub>2</sub>     |
| Histone H3 K14ac Peptide, Biotinylated           | ARTKQTARKSTGGK(Ac)APRKQL-K(Biot)-NH <sub>2</sub>     |
| Histone H3 K9, K14ac Peptide, Biotinylated       | ARTKQTARK(Ac)STGGK(Ac)APRKQL-K(Biot)-NH <sub>2</sub> |
| Histone H4 N-terminal Peptide, Biotinylated      | Ac-SGRGKGGKGLGKGGAKRHRKVLR-Peg-Biot                  |
| Histone H4 K5ac Peptide, Biotinylated            | Ac-SGRGK(Ac)GGKGLGKGGAKRHRKVLR-Peg-Biot              |
| Histone H4 K8ac Peptide, Biotinylated            | Ac-SGRGKGGK(Ac)GLGKGGAKRHRKVLR-Peg-Biot              |
| Histone H4 K12ac Peptide, Biotinylated           | Ac-SGRGKGGKGLGK(Ac)GGAKRHRKVLR-Peg-Biot              |
| Histone H4 K16ac Peptide, Biotinylated           | Ac-SGRGKGGKGLGKGGAK(Ac)RHRKVLR-Peg-Biot              |
| Histone H4 K5,K8,K12,K16ac Peptide, Biotinylated | Ac-SGRGK(Ac)GGK(Ac)GLGK(Ac)GGAK(Ac)RHRKVLR-Peg-Biot  |

Supplementary Table 5. Mitotic and kinase GO terms of the 24 mitotic genes consistently upregulated by BRD3R

| gene           | Biological process                                                                                                                                                                                                                                                                                                                                                                                                                                                                                                                                                                                                                                                                                                                                                                                                                                                                                | Cellular component                                                                                           | Molecular function                                                                                                                                                                                                                                                   |
|----------------|---------------------------------------------------------------------------------------------------------------------------------------------------------------------------------------------------------------------------------------------------------------------------------------------------------------------------------------------------------------------------------------------------------------------------------------------------------------------------------------------------------------------------------------------------------------------------------------------------------------------------------------------------------------------------------------------------------------------------------------------------------------------------------------------------------------------------------------------------------------------------------------------------|--------------------------------------------------------------------------------------------------------------|----------------------------------------------------------------------------------------------------------------------------------------------------------------------------------------------------------------------------------------------------------------------|
| <i>AURKB</i>   | mitotic cell cycle, protein phosphorylation, mitotic nuclear division, attachment of spindle microtubules to kinetochore, anaphase-promoting complex-dependent proteasomal ubiquitin-dependent protein catabolic process, cytokinesis checkpoint, spindle checkpoint, negative regulation of cytokinesis, positive regulation of cytokinesis, protein localization to kinetochore, cleavage furrow formation, spindle stabilization, histone H3-S28 phosphorylation, protein autophosphorylation, spindle midzone assembly involved in mitosis                                                                                                                                                                                                                                                                                                                                                    | condensed chromosome, condensed nuclear chromosome, midbody, chromosome passenger complex                    | protein kinase activity, protein serine/threonine kinase activity, protein serine/threonine/tyrosine kinase activity, protein tyrosine kinase activity, histone serine kinase activity,                                                                              |
| <i>CCNA1</i>   | Regulation of cyclin-dependent protein serine/threonine kinase activity, G1/S transition of mitotic cell cycle, regulation of transcription involved in G1/S transition of mitotic cell cycle, G2/M transition of mitotic cell cycle, mitotic cell cycle, mitotic nuclear division, male meiosis I, regulation of G2/M transition of mitotic cell cycle                                                                                                                                                                                                                                                                                                                                                                                                                                                                                                                                           |                                                                                                              | protein kinase binding                                                                                                                                                                                                                                               |
| <i>CCNB1</i>   | G1/S transition of mitotic cell cycle, G2/M transition of mitotic cell cycle, mitotic cell cycle, negative regulation of protein phosphorylation, protein phosphorylation, mitotic nuclear envelope disassembly, mitotic metaphase plate congression, histone phosphorylation, anaphase-promoting complex-dependent proteasomal ubiquitin-dependent protein catabolic process, positive regulation of histone phosphorylation, mitotic spindle stabilization, positive regulation of mitotic cell cycle, positive regulation of ubiquitin-protein ligase activity involved in mitotic cell cycle, positive regulation of attachment of spindle microtubules to kinetochore, regulation of chromosome condensation, mitotic spindle checkpoint, histone H3-S10 phosphorylation involved in chromosome condensation                                                                                 | Spindle pole, condensed nuclear chromosome outer kinetochore                                                 | kinase activity, protein kinase activity, histone kinase activity                                                                                                                                                                                                    |
| <i>CDC20</i>   | Mitotic cell cycle, mitotic nuclear division, mitotic spindle assembly checkpoint, anaphase-promoting complex-dependent proteasomal ubiquitin-dependent protein catabolic process, regulation of meiosis, regulation of meiosis, negative regulation of ubiquitin-protein ligase activity involved in mitotic cell cycle, positive regulation of ubiquitin-protein ligase activity in mitotic cell cycle, regulation of ubiquitin-protein ligase activity involved in mitotic cell cycle, activation of anaphase-promoting complex activity,                                                                                                                                                                                                                                                                                                                                                      | anaphase-promoting complex, centrosome                                                                       |                                                                                                                                                                                                                                                                      |
| <i>CDC6</i>    | DNA replication checkpoint, regulation of cyclin-dependent protein serine/threonine kinase activity, G1/S transition of mitotic cell cycle, regulation of transcription involved in G1/S transition of mitotic cell cycle, mitotic cell cycle, mitotic nuclear division, traversing start control point of mitotic cell cycle, regulation of mitotic metaphase/anaphase transition, positive regulation of cytokinesis, positive regulation of chromosome segregation                                                                                                                                                                                                                                                                                                                                                                                                                             | Spindle pole, spindle midzone                                                                                | kinase binding                                                                                                                                                                                                                                                       |
| <i>CDCA3</i>   | mitotic nuclear division                                                                                                                                                                                                                                                                                                                                                                                                                                                                                                                                                                                                                                                                                                                                                                                                                                                                          |                                                                                                              |                                                                                                                                                                                                                                                                      |
| <i>CDCA5</i>   | G1/S transition of mitotic cell cycle, mitotic cell cycle, mitotic sister chromatid cohesion, mitotic nuclear division, mitotic chromosome condensation, mitotic metaphase plate congression, mitotic interphase, regulation of cohesin localization to chromatin                                                                                                                                                                                                                                                                                                                                                                                                                                                                                                                                                                                                                                 | cohesin complex                                                                                              |                                                                                                                                                                                                                                                                      |
| <i>CDK1</i>    | G1/S transition of mitotic cell cycle, regulation of transcription involved in G1/S transition of mitotic cell cycle, G2/M transition of mitotic cell cycle, MAPK cascade, activation of MAPKK activity, activation of MAPK activity, mitotic cell cycle, DNA replication, protein phosphorylation, mitotic nuclear division, mitotic nuclear envelope disassembly, mitotic G2 DNA damage checkpoint, centrosome cycle, histone phosphorylation, peptidyl-serine phosphorylation, chromosome condensation, anaphase-promoting complex-dependent proteasomal ubiquitin-dependent protein catabolic process, protein localization to kinetochore, positive regulation of mitotic cell cycle, stress-activated MAPK cascade, positive regulation of ubiquitin-protein ligase activity involved in mitotic cell cycle, regulation of ubiquitin-protein ligase activity involved in mitotic cell cycle | centrosome, midbody, mitotic spindle                                                                         | protein kinase activity, protein serine/threonine kinase activity, cyclin-dependent protein serine/threonine kinase activity, protein tyrosine kinase activity, RNA polymerase II carboxy-terminal domain kinase activity, kinase activity, histone kinase activity. |
| <i>CDKN1C</i>  | negative regulation of kinase activity, negative regulation of phosphorylation, negative regulation of protein serine/threonine kinase activity, regulation of mitotic cell cycle                                                                                                                                                                                                                                                                                                                                                                                                                                                                                                                                                                                                                                                                                                                 |                                                                                                              | Cyclin-dependent protein serine/threonine kinase inhibitor activity                                                                                                                                                                                                  |
| <i>CENPF</i>   | G2/M transition of mitotic cell cycle, mitotic cell cycle, chromosome segregation, mitotic nuclear division, mitotic spindle assembly checkpoint, regulation of G2/M transition of mitotic cell cycle, metaphase plate congression, kinetochore assembly                                                                                                                                                                                                                                                                                                                                                                                                                                                                                                                                                                                                                                          | kinetochore, spindle pole, condensed chromosome outer kinetochore, midbody                                   |                                                                                                                                                                                                                                                                      |
| <i>CEP55</i>   | mitotic cytokinesis, mitotic nuclear division                                                                                                                                                                                                                                                                                                                                                                                                                                                                                                                                                                                                                                                                                                                                                                                                                                                     | centrosome, centriole, midbody, cleavage furrow                                                              |                                                                                                                                                                                                                                                                      |
| <i>CKS2</i>    | regulation of cyclin-dependent protein serine/threonine kinase activity, spindle organization, meiosis I                                                                                                                                                                                                                                                                                                                                                                                                                                                                                                                                                                                                                                                                                                                                                                                          |                                                                                                              | cyclin-dependent protein serine/threonine kinase regulator activity                                                                                                                                                                                                  |
| <i>DLGAP5</i>  | mitotic M phase, mitotic chromosome movement towards spindle pole, dephosphorylation, positive regulation of mitotic metaphase/anaphase transition.                                                                                                                                                                                                                                                                                                                                                                                                                                                                                                                                                                                                                                                                                                                                               | microtubule organizing center, spindle pole centrosome                                                       | phosphoprotein phosphatase activity,                                                                                                                                                                                                                                 |
| <i>FAM64A</i>  | mitotic nuclear division                                                                                                                                                                                                                                                                                                                                                                                                                                                                                                                                                                                                                                                                                                                                                                                                                                                                          |                                                                                                              |                                                                                                                                                                                                                                                                      |
| <i>FEN1</i>    | mitotic cell cycle                                                                                                                                                                                                                                                                                                                                                                                                                                                                                                                                                                                                                                                                                                                                                                                                                                                                                |                                                                                                              |                                                                                                                                                                                                                                                                      |
| <i>ITGB3BP</i> | mitotic cell cycle, mitotic nuclear division                                                                                                                                                                                                                                                                                                                                                                                                                                                                                                                                                                                                                                                                                                                                                                                                                                                      | kinetochore                                                                                                  |                                                                                                                                                                                                                                                                      |
| <i>KIF20A</i>  | mitotic cell cycle, cytokinesis                                                                                                                                                                                                                                                                                                                                                                                                                                                                                                                                                                                                                                                                                                                                                                                                                                                                   | kinesin complex, spindle                                                                                     | protein kinase binding                                                                                                                                                                                                                                               |
| <i>KIF2C</i>   | chromosome segregation, mitotic cell cycle, mitotic nuclear division, regulation of chromosome segregation                                                                                                                                                                                                                                                                                                                                                                                                                                                                                                                                                                                                                                                                                                                                                                                        | kinetochore, kinesin complex                                                                                 |                                                                                                                                                                                                                                                                      |
| <i>MAD2L1</i>  | Mitotic sister chromatid segregation, mitotic cell cycle, mitotic cell cycle checkpoint, mitotic spindle assembly checkpoint, anaphase-promoting complex-dependent proteasomal ubiquitin-dependent protein catabolic process, negative regulation of mitotic cell cycle, negative regulation of ubiquitin-protein ligase activity involved in mitotic cell cycle, regulation of ubiquitin-protein ligase activity involved in mitotic cell cycle, negative regulation of mitotic anaphase-promoting complex activity, positive regulation of mitotic cell cycle spindle assembly checkpoint                                                                                                                                                                                                                                                                                                       | Chromosome-centromeric region, kinetochore, condensed chromosome-kinetochore, spindle pole, mitotic spindle, |                                                                                                                                                                                                                                                                      |
| <i>PBK</i>     | mitotic nuclear division, protein phosphorylation                                                                                                                                                                                                                                                                                                                                                                                                                                                                                                                                                                                                                                                                                                                                                                                                                                                 |                                                                                                              | protein kinase activity, protein serine/threonine kinase activity, protein tyrosine kinase activity                                                                                                                                                                  |
| <i>SPC24</i>   | Mitotic cell cycle, mitotic nuclear division                                                                                                                                                                                                                                                                                                                                                                                                                                                                                                                                                                                                                                                                                                                                                                                                                                                      | Ndc80 complex                                                                                                |                                                                                                                                                                                                                                                                      |
| <i>SPC25</i>   | mitotic cell cycle, mitotic spindle organization, chromosome segregation, mitotic nuclear division                                                                                                                                                                                                                                                                                                                                                                                                                                                                                                                                                                                                                                                                                                                                                                                                | Condensed chromosome kinetochore, Ndc80 complex                                                              |                                                                                                                                                                                                                                                                      |
| <i>UBE2C</i>   | mitotic cell cycle, spindle organization, mitotic spindle assembly checkpoint, exit from mitosis, anaphase-promoting complex-dependent proteasomal ubiquitin-dependent protein catabolic process, positive regulation of exit from mitosis, negative regulation of ubiquitin-protein ligase activity involved in mitotic cell cycle, positive regulation of ubiquitin-protein ligase activity involved in mitotic cell cycle, regulation of ubiquitin-protein ligase activity involved in mitotic cell cycle, activation of anaphase-promoting complex activity                                                                                                                                                                                                                                                                                                                                   | anaphase-promoting complex                                                                                   |                                                                                                                                                                                                                                                                      |
| <i>ZWINT</i>   | mitotic sister chromatid segregation, mitotic cell cycle, mitotic cell cycle checkpoint                                                                                                                                                                                                                                                                                                                                                                                                                                                                                                                                                                                                                                                                                                                                                                                                           | kinetochore, condensed chromosome                                                                            |                                                                                                                                                                                                                                                                      |

Notes: GO terms are extracted from Ensembl human genome database ([www.ensembl.org](http://www.ensembl.org)). *CDKN1C* is identified as a mitotic gene by PANTHER (<http://pantherdb.org>). But it is not associated with any mitotic GO term in Ensembl. Nevertheless, QickGO (<http://www.ebi.ac.uk/QuickGO/>) returns a GO term of “regulation of mitotic cell cycle” for *CDKN1C*. Mitotic GO terms are highlighted in red, and kinase or kinase-related GO terms are highlighted in blue. Others GO terms are apparently related to mitotic GO terms. Non-mitotic and non-kinase GO terms are not listed.
